# Supplementary material for: Unusual activation by solvent of the ethylene free radical polymerization
Source: Royal Society of Chemistry journal article supplement (doi:10.1039/c1py00200g), 2011-01-01
Supplement: c1py00200g.pdf [file c1py00200g.pdf]

## **Electronic Supplementary Information**

# **Unusual Activation by Solvent of the Ethylene Free Radical**

## **Polymerization**

Etienne Grau, Jean-Pierre Broyer, Christophe Boisson, Roger Spitz, Vincent Monteil\*

## Details of calculation of the optimum of solvent properties thanks to the Arrhenius parameters.

Free radical polymerization kinetics law link monomer conversion to the global kinetic constant. Thanks to the set of experiments we now the Arrhenius parameters dependence to the solvent properties  $\left(\frac{\mu}{\varepsilon}\right)^2$ .

$$\ln \frac{1}{1-x} \propto k_{tot}$$

$$\ln k_{tot} = \ln A_{tot} - \frac{E_{tot}}{RT}$$

$$X = \left(\frac{\mu}{\varepsilon}\right)^2 > 0$$

$$\ln A_{tot} = a \frac{1}{X} + b$$

$$E_{tot} = cX + d$$

Then we can calculate the optimum dependence with the temperature.

$$\frac{\partial \ln k_{tot}}{\partial X} = 0$$

$$\frac{\partial \ln k_{tot}}{\partial X} = \frac{\partial \ln A_{tot}}{\partial X} - \frac{1}{RT} \frac{\partial E_{tot}}{\partial X}$$

$$0 = -a \frac{1}{X^2} - \frac{c}{RT}$$

$$X = \sqrt{-\frac{aRT}{c}}$$

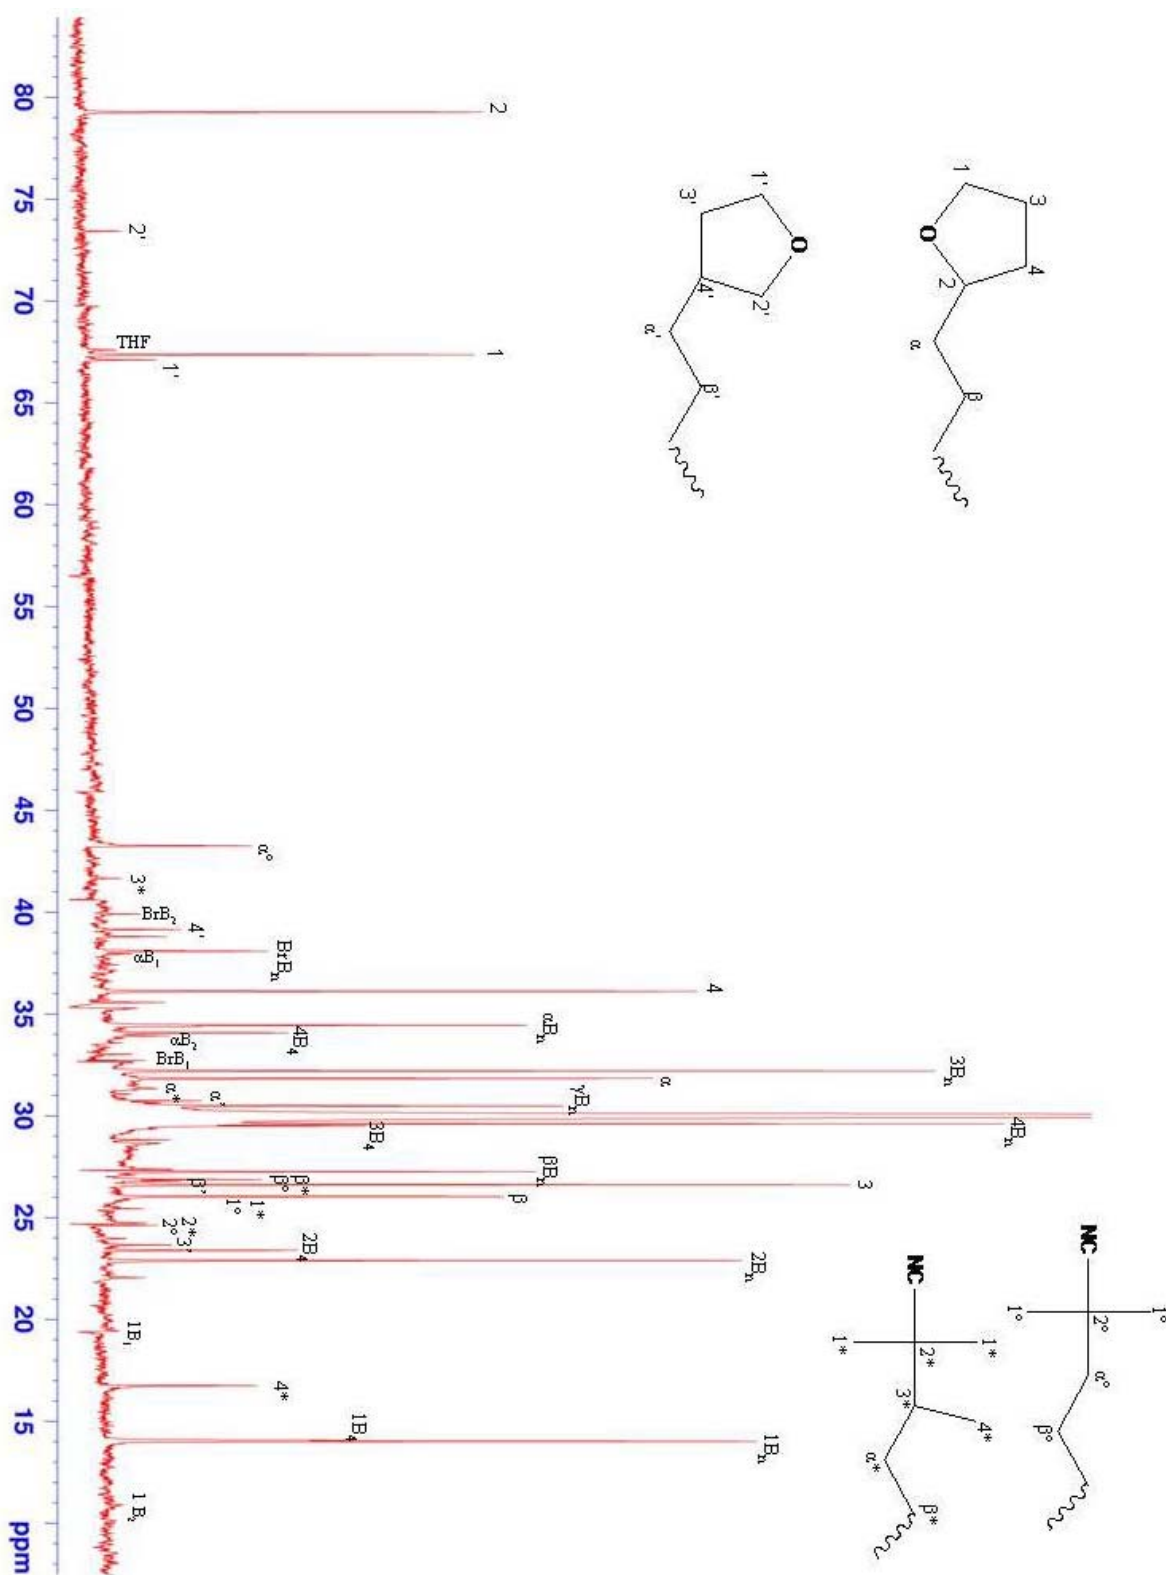

Figure S1: Typical  $^{13}\text{C}$  NMR of polyethylene prepared in THF (notations from Galland et al for branching description ref 22 and ref 5 of the article)

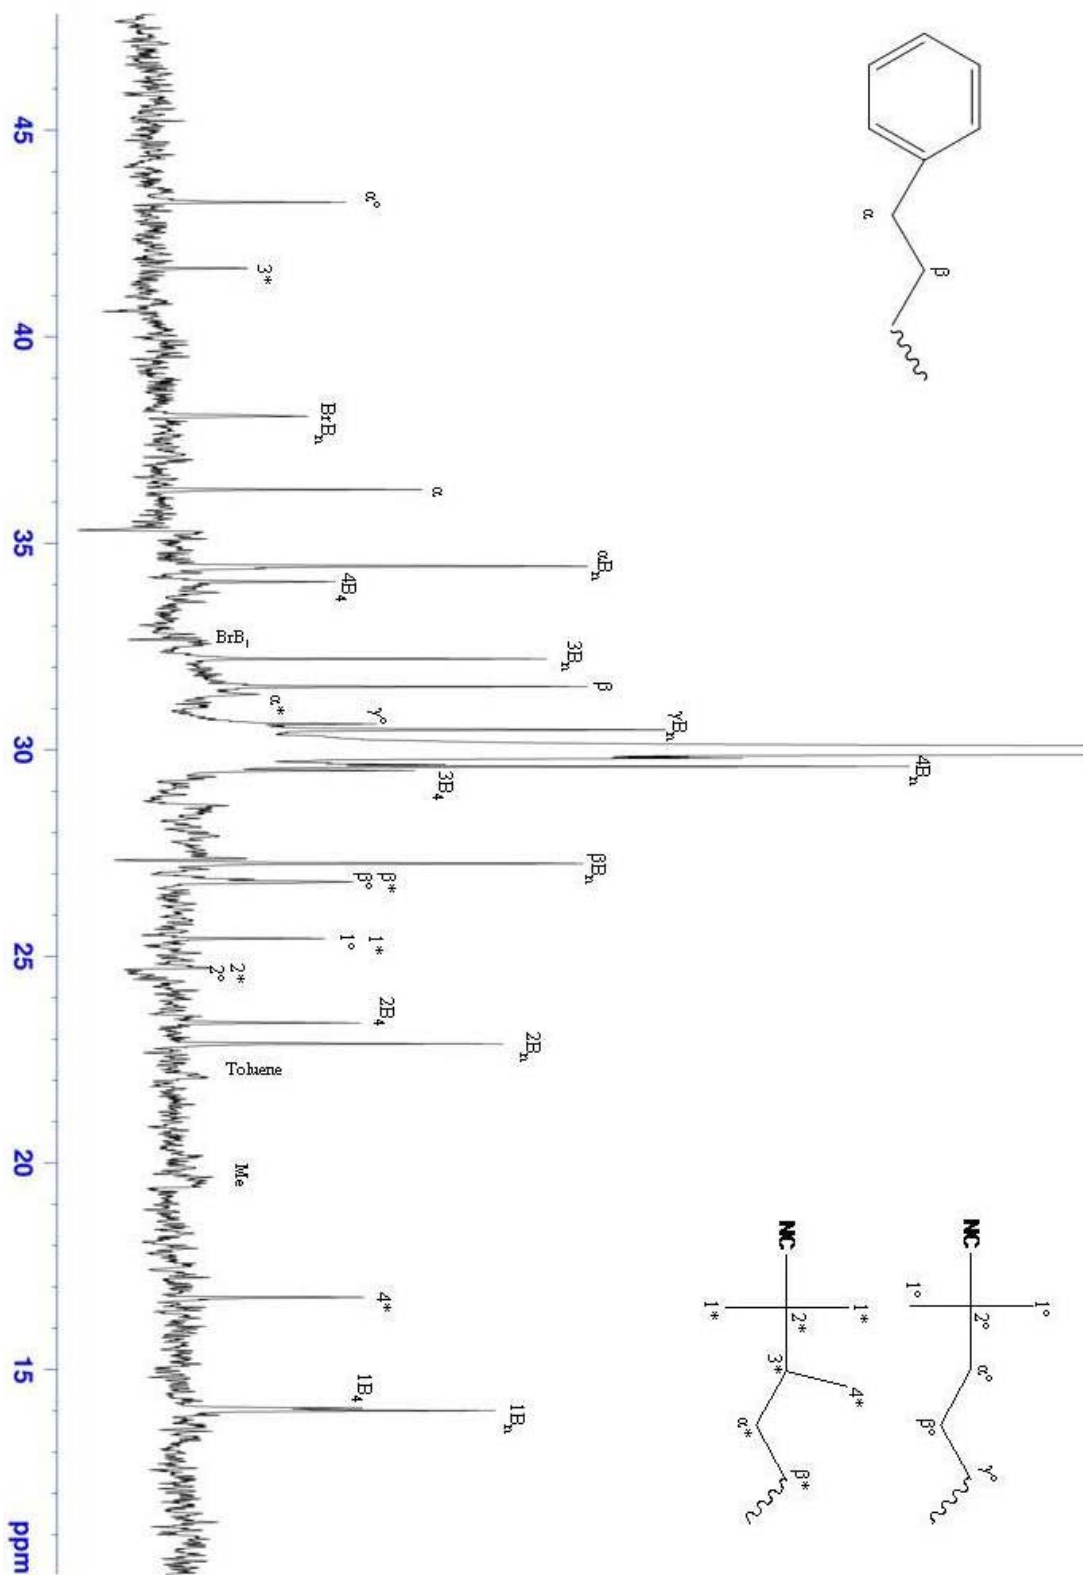

Figure S2: Typical  $^{13}\text{C}$  NMR of polyethylene prepared in toluene (notation from Galland et

al)

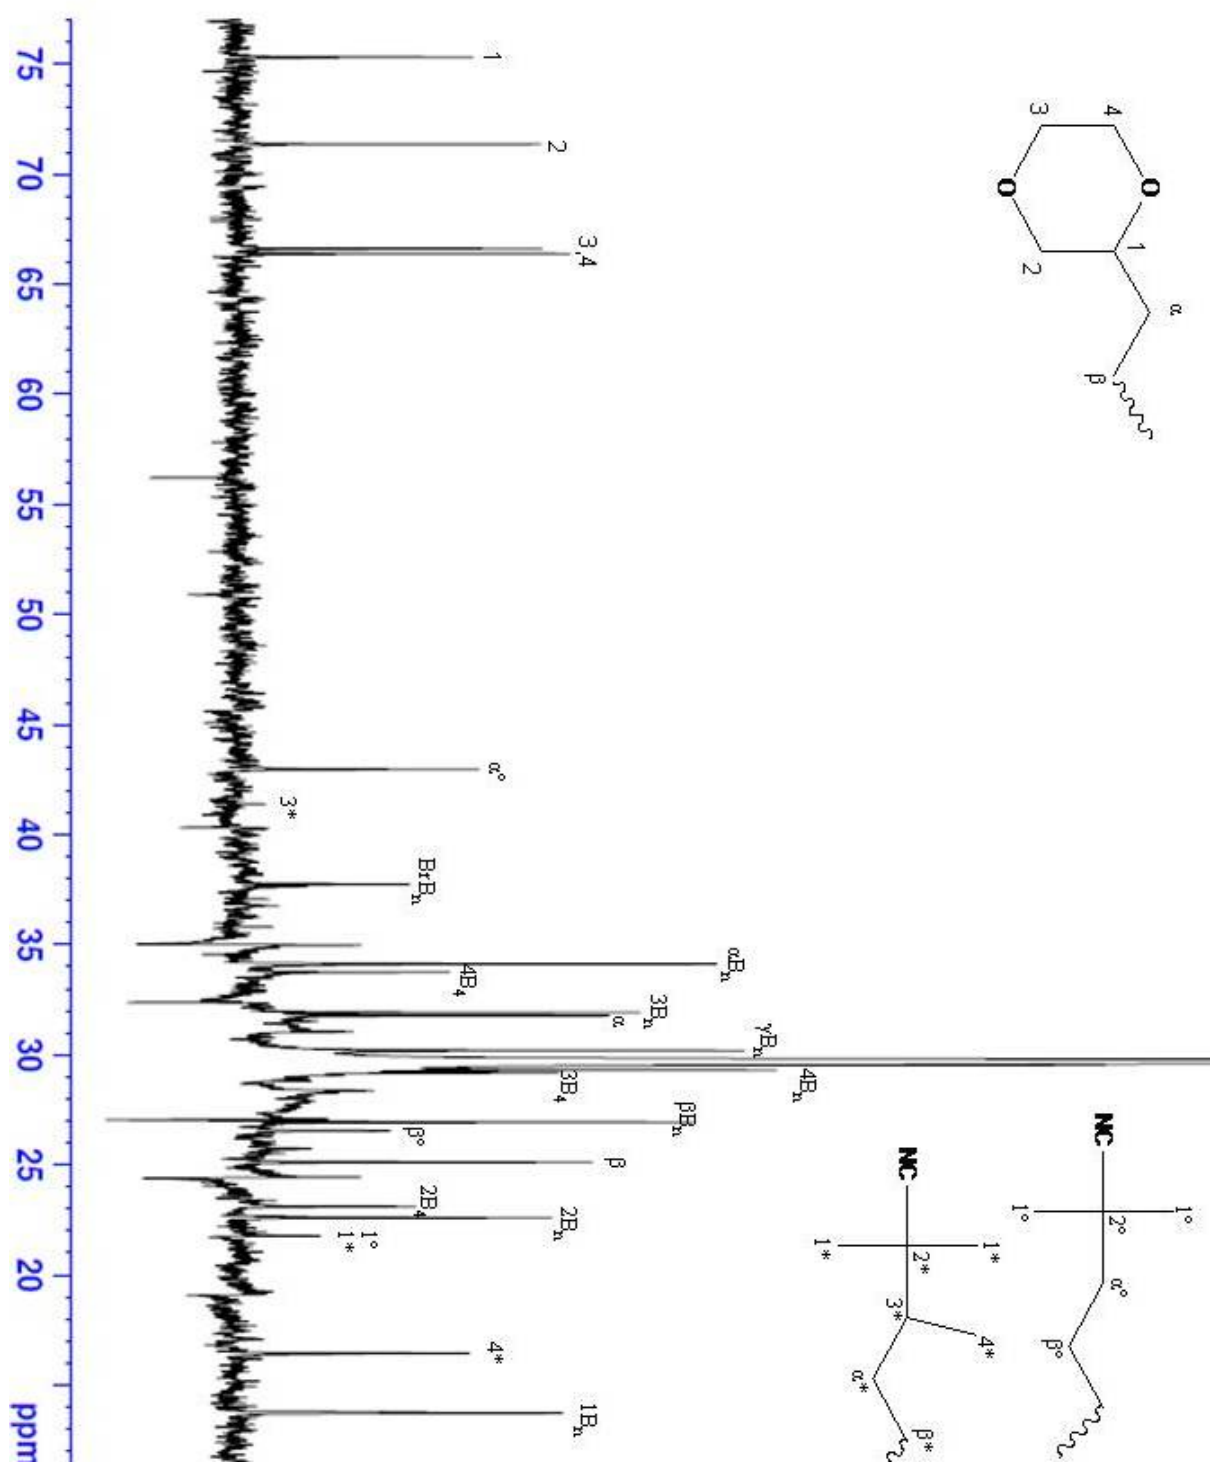

Figure S3: Typical  $^{13}\text{C}$  NMR of polyethylene prepared in dioxane (notation from Galland et al)

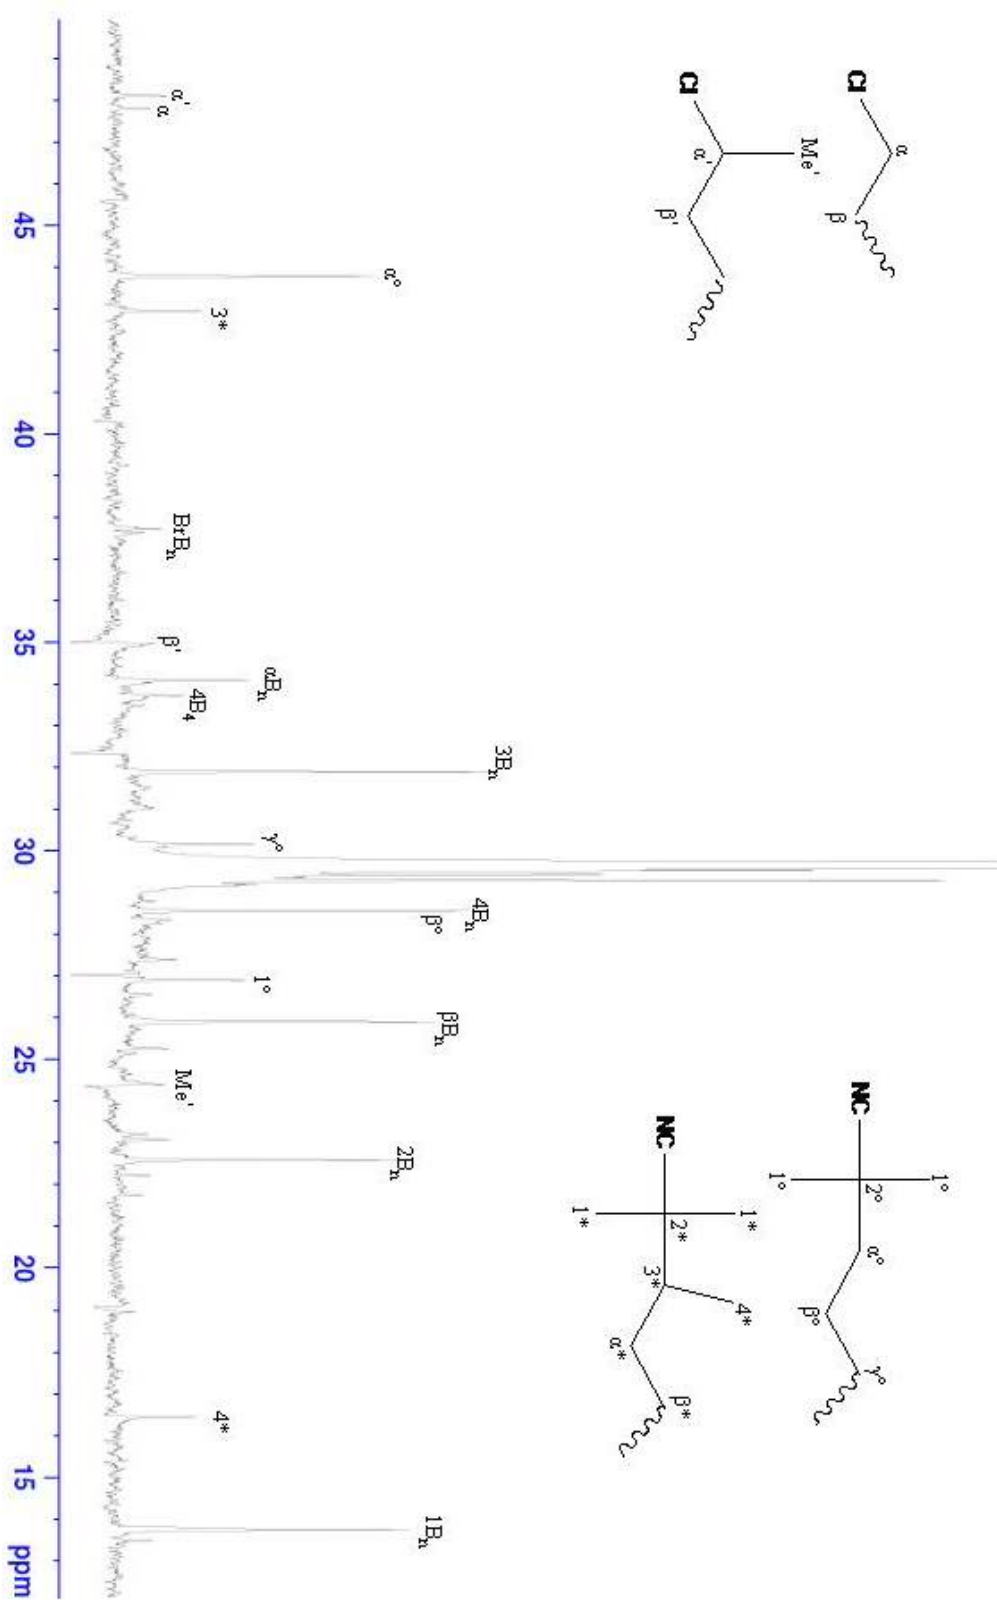

Figure S4: Typical  $^{13}\text{C}$  NMR of polyethylene prepared in dichloromethane (notation from Galland et al)

Table S1 : Solvent mixture composition effect on radical polymerization of ethylene<sup>a</sup>

| Run         | Solvent composition in volume (% toluene / % THF/ % DEC) | Yield (g) | Mn (g/mol) | PDI |
|-------------|----------------------------------------------------------|-----------|------------|-----|
| 21<br>(=4)  | 100/0/0                                                  | 0.65      | 2340       | 1.9 |
| 22          | 90/10/0                                                  | 0.75      | 1840       | 1.8 |
| 23          | 70/30/0                                                  | 0.8       | 1260       | 2.  |
| 24          | 50/50/0                                                  | 1.1       | 1190       | 2.1 |
| 25          | 30/70/0                                                  | 1.8       | 1170       | 2.1 |
| 26          | 10/90/0                                                  | 3.1       | 1190       | 1.9 |
| 27<br>(=21) | 0/100/0                                                  | 3.9       | 1190       | 1.9 |
| 28          | 0/90/10                                                  | 4         | 1270       | 1.8 |
| 29          | 0/70/30                                                  | 3.8       | 1560       | 2.1 |
| 30          | 0/50/50                                                  | 3.3       | 2490       | 1.7 |
| 31          | 0/30/70                                                  | 2.4       | 2700       | 2.1 |
| 32          | 0/10/90                                                  | 1.9       | 5360       | 2.4 |
| 33<br>(=7)  | 0/0/100                                                  | 1.2       | 7150       | 2.5 |
| 34          | 10/0/90                                                  | 1.8       | 6630       | 2.4 |
| 35          | 30/0/70                                                  | 2.5       | 4650       | 2.1 |
| 36          | 50/0/50                                                  | 4         | 3210       | 2.6 |
| 37          | 70/0/30                                                  | 1.8       | 2640       | 2.1 |
| 38          | 90/0/10                                                  | 0.7       | 2340       | 2.1 |
| 39          | 40/40/20                                                 | 2         | 2650       | 1.6 |
| 40          | 40/20/40                                                 | 4.1       | 5970       | 2   |
| 41          | 20/40/40                                                 | 3.7       | 2010       | 2.2 |

<sup>a</sup> Reactions were carried at 70°C under 100 bar of ethylene pressure during 4h with 50 mg AIBN in 50 mL of solvent

Table S2 : Temperature impact on radical polymerization of ethylene<sup>a</sup>

| <b>Run</b>  | <b>Solvent</b> | <b>Temperature<br/>(°C)</b> | <b>Ethylene<br/>pressure<br/>(bar)</b> | <b>Yield (g)<br/>[conversion %]</b> |
|-------------|----------------|-----------------------------|----------------------------------------|-------------------------------------|
| 42          | Toluene        | 50                          | 50                                     | 0.05 [0.5%]                         |
| 43          | Toluene        | 70                          | 50                                     | 0.25 [2.7%]                         |
| 44          | Toluene        | 90                          | 50                                     | 0.4 [4.8%]                          |
| 45          | Toluene        | 50                          | 100                                    | 0.15 [0.4%]                         |
| 46 (=4)     | Toluene        | 70                          | 100                                    | 0.7 [2.6%]                          |
| 47          | Toluene        | 90                          | 100                                    | 1.3 [6.5%]                          |
| 48          | Toluene        | 50                          | 150                                    | 0.15 [0.4%]                         |
| 49          | Toluene        | 70                          | 150                                    | 0.8 [2%]                            |
| 50          | Toluene        | 90                          | 150                                    | 1.7 [5.2%]                          |
| 51          | Toluene        | 50                          | 200                                    | 0.2 [0.4%]                          |
| 52          | Toluene        | 70                          | 200                                    | 1 [2.1%]                            |
| 53          | Toluene        | 90                          | 200                                    | 2 [4.8%]                            |
| 54          | Toluene        | 50                          | 250                                    | 0.25 [0.4%]                         |
| 55          | Toluene        | 70                          | 250                                    | 1.3 [2.5%]                          |
| 56          | Toluene        | 90                          | 250                                    | 2.5 [5.3%]                          |
| 57          | THF            | 50                          | 50                                     | 0.4 [3.7%]                          |
| 58          | THF            | 70                          | 50                                     | 2.9 [31.2%]                         |
| 59          | THF            | 90                          | 50                                     | 4.1 [49.4%]                         |
| 60          | THF            | 50                          | 100                                    | 0.6 [1.8%]                          |
| 61<br>(=21) | THF            | 70                          | 100                                    | 3.9 [15.7%]                         |
| 62          | THF            | 90                          | 100                                    | 9 [44.7%]                           |
| 63          | THF            | 50                          | 150                                    | 0.8 [1.7%]                          |



|         |     |    |     |             |
|---------|-----|----|-----|-------------|
| 64      | THF | 70 | 150 | 5.9 [15%]   |
| 65      | THF | 90 | 150 | 11 [33.6%]  |
| 66      | THF | 50 | 200 | 1 [1.9%]    |
| 67      | THF | 70 | 200 | 6.5 [13.8%] |
| 68      | THF | 90 | 200 | 14.5 [35%]  |
| 69      | THF | 50 | 250 | 1.2 [2.1%]  |
| 70      | THF | 70 | 250 | 7.8 [14.9%] |
| 71      | THF | 90 | 250 | 17 [35.9%]  |
| 72      | DEC | 50 | 50  | 0.1 [0.9%]  |
| 73      | DEC | 70 | 50  | 0.7 [7.5%]  |
| 74      | DEC | 90 | 50  | 2.5 [30.1%] |
| 75      | DEC | 50 | 100 | 0.3 [0.9%]  |
| 76 (=7) | DEC | 70 | 100 | 1.2 [3.5%]  |
| 77      | DEC | 90 | 100 | 4.3 [12.5%] |
| 78      | DEC | 50 | 150 | 0.2 [0.4%]  |
| 79      | DEC | 70 | 150 | 1.9 [4.8%]  |
| 80      | DEC | 90 | 150 | 5 [15.3%]   |
| 81      | DEC | 50 | 200 | 0.2 [0.4%]  |
| 82      | DEC | 70 | 200 | 2.9 [6.2%]  |
| 83      | DEC | 90 | 200 | 6.3 [15.2%] |
| 84      | DEC | 50 | 250 | 0.2 [0.3%]  |
| 85      | DEC | 70 | 250 | 3.5 [6.6%]  |
| 86      | DEC | 90 | 250 | 7.2 [15.2%] |

---

<sup>a</sup>Reactions were carried under ethylene pressure during 4 hours with 50mg AIBN in 50 mL of solvent

1-hexyl radical has been simulated using GAUSSIAN03 using restricted open shell B3LYP/6-311++G basis.

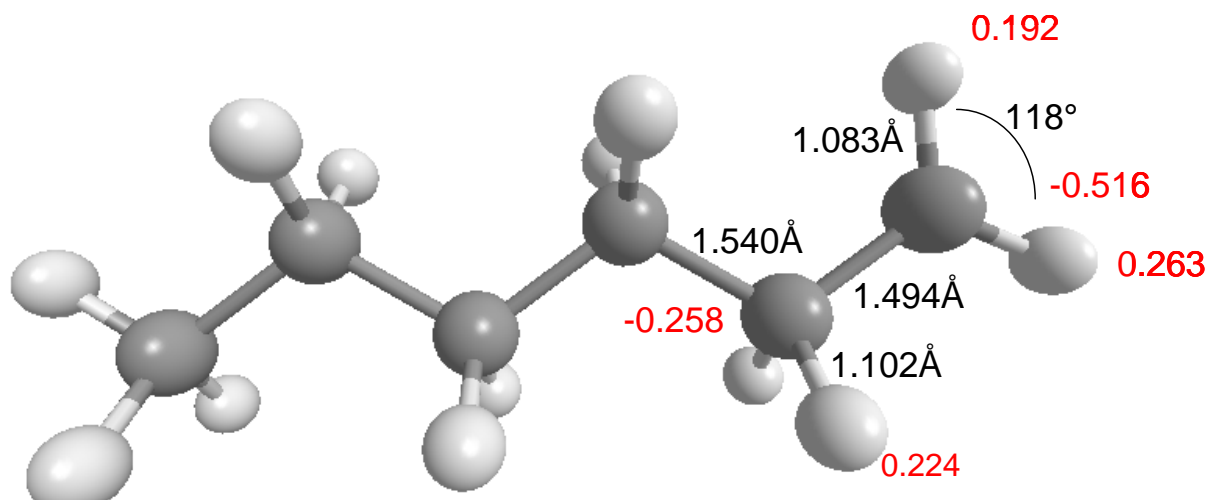

Figure S5: Relaxed 1-hexyl radical determined using GAUSSIAN03 calculation (in red are the partial Mulliken charge)

Table S3 : XYZ coordinates and mulliken charge of all atoms of 1-hexyl radical

|   | X (Å)     | Y (Å)       | Z (Å)       | Mulliken charge |
|---|-----------|-------------|-------------|-----------------|
| C | -3.068705 | -0.78129438 | -0.00968804 | -0.936163       |
| C | -1.899007 | 0.21412305  | -0.00092907 | -0.22222        |
| C | -0.520477 | -0.46837619 | -0.00412973 | -0.45143        |
| C | 0.6554958 | 0.52105771  | 0.00478151  | -0.500515       |
| C | 2.035075  | -0.16299197 | 0.00117502  | -0.258503       |
| C | 3.1874262 | 0.78814546  | 0.01004793  | -0.516226       |
| H | -4.03192  | -0.26585788 | -0.00728355 | 0.239686        |
| H | -3.038214 | -1.43268143 | 0.8680714   | 0.21495         |
| H | -3.035814 | -1.41996189 | -0.8966608  | 0.21494         |
| H | -1.976931 | 0.86169144  | 0.87977864  | 0.220248        |
| H | -1.974673 | 0.87445422  | -0.87230679 | 0.220244        |
| H | -0.442232 | -1.11642707 | -0.88584924 | 0.210398        |
| H | -0.44459  | -1.12941321 | 0.86810397  | 0.210358        |
| H | 0.5799197 | 1.16707995  | 0.88708638  | 0.225668        |

---

|   |           |             |             |          |
|---|-----------|-------------|-------------|----------|
| H | 0.5819664 | 1.18047349  | -0.86772897 | 0.225685 |
| H | 2.1035051 | -0.82799116 | -0.87428211 | 0.223605 |
| H | 2.1012486 | -0.8415595  | 0.86636991  | 0.223715 |
| H | 4.2081217 | 0.4266013   | 0.00732591  | 0.192124 |
| H | 3.030765  | 1.85960971  | 0.01982957  | 0.192124 |

---

The punctual dipole momentum of the radical is calculated by  $\mu_{\text{radical}} = \sum q_i r_i$  with an origine corresponding to the barycenter of the  $\text{C}_2\text{H}_2^\bullet$  unit. Therefore  $\mu_{\text{radical}} = 1.5009$  C.m.

AIBN fragment radical has been simulated using GAUSSIAN03 using restricted open shell B3LYP/6-311++G basis.

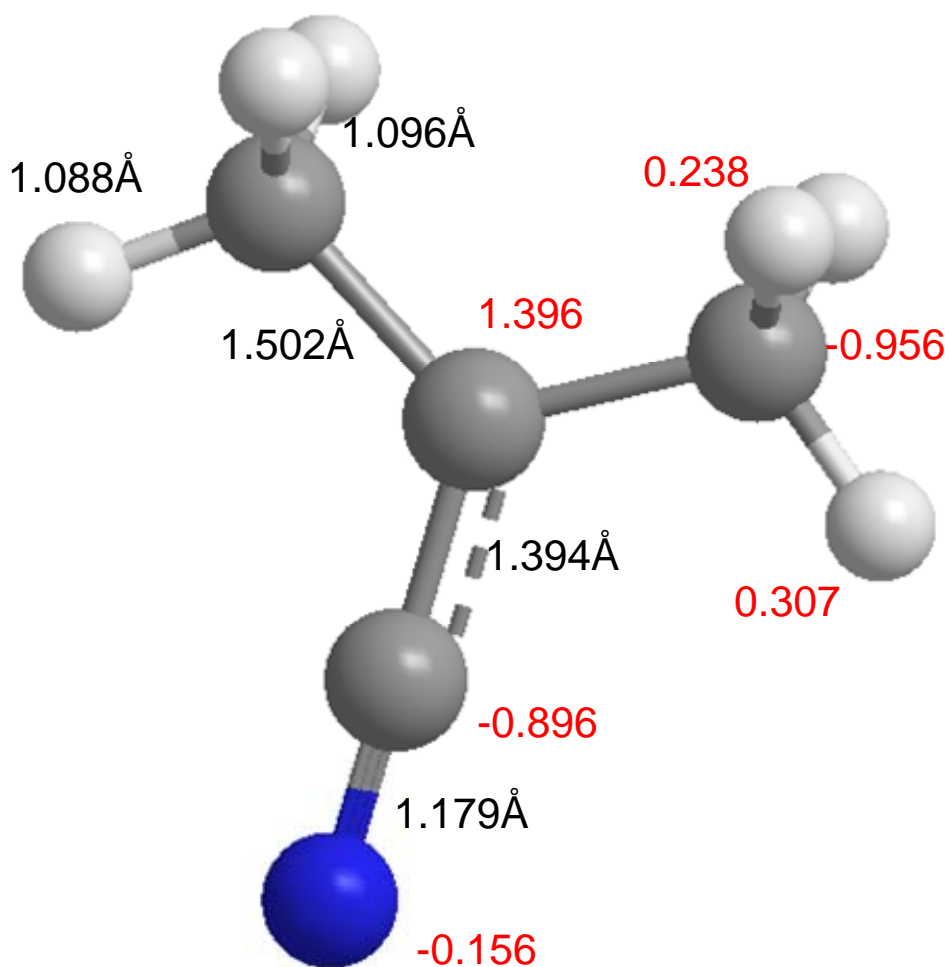

Figure S6: Relaxed AIBN fragment ( $((\text{CH}_3)_2\text{C}^\bullet\text{CN})$ ) determined using GAUSSIAN03 calculation (in red are the partial Mulliken charge)

Table S4 : XYZ coordinates and Mulliken charge of all atoms of AIBN fragment

|   | X (Å)         | Y (Å)         | Z (Å)         | Mulliken charge |
|---|---------------|---------------|---------------|-----------------|
| C | -0.0122706683 | 0.2201925596  | -0.2163932989 | 1.395675        |
| C | 0.9974644499  | 1.3322570133  | -0.2254218486 | -0.955998       |
| C | -1.0755799762 | 0.1832120249  | -1.2767479919 | -0.955956       |
| C | 0.0395995858  | -0.7697845441 | 0.7632715439  | -0.895831       |
| N | 0.0833215632  | -1.6072846018 | 1.5921380806  | -0.156196       |
| H | 1.7067482815  | 1.2509183719  | 0.5958362627  | 0.307336        |

---

|   |               |               |               |          |
|---|---------------|---------------|---------------|----------|
| H | 0.501442927   | 2.3070625122  | -0.154625786  | 0.238347 |
| H | 1.5615569264  | 1.3366018246  | -1.1653678806 | 0.238469 |
| H | -1.7482882897 | -0.6635400293 | -1.1557594958 | 0.307338 |
| H | -0.6263192804 | 0.1231975998  | -2.2748916962 | 0.238501 |
| H | -1.6736718546 | 1.1014896111  | -1.2584083956 | 0.238315 |

---

The punctual dipole momentum of the radical is calculated by  $\mu_{\text{radical}} = \sum q_i r_i$  with an origine corresponding to the barycenter of the AIBN fragment. Therefore  $\mu_{\text{radical}} = 1.605$  C.m.
